# Supplementary material for: FANCJ promotes PARP1 activity during DNA replication that is essential in BRCA1 deficient cells
Source: PubMed Central journal article supplement (PMC10960859; doi:10.1038/s41467-024-46824-5), 2024-03-23
Supplement: 41467_2024_46824_MOESM1_ESM.pdf [file 41467_2024_46824_MOESM1_ESM.pdf]

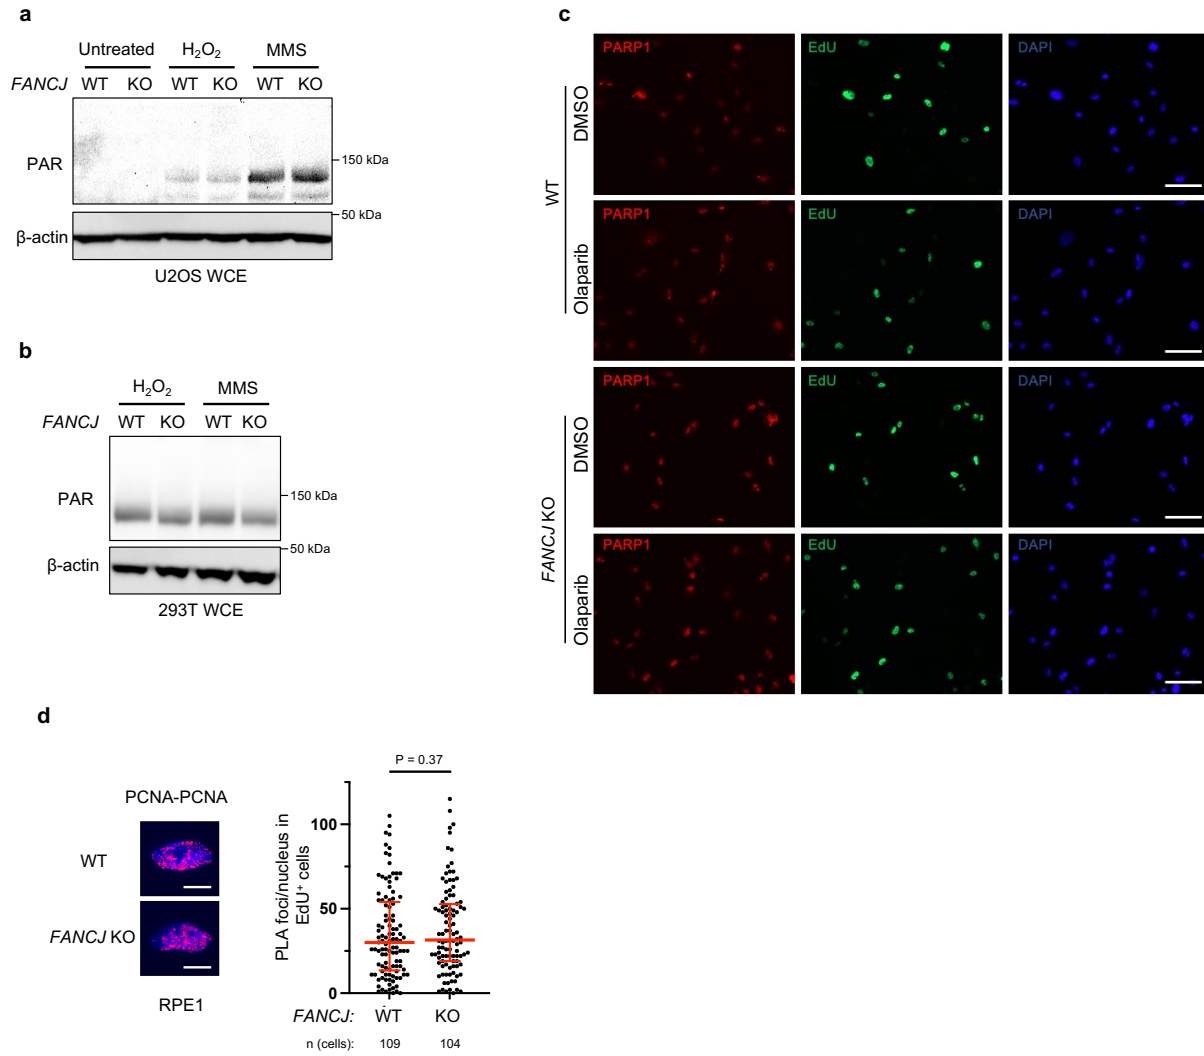

**Supplementary Figure 1: FANCD1 deficiency does not reduce PAR response to DNA damage.**

**a, b** Representative WB from 2 independent experiments for PAR in the indicated cells under untreated growth conditions or following the treatment of DNA damage-inducing agents methyl methanesulfonate (MMS) and H<sub>2</sub>O<sub>2</sub> for 40 min.

**c** Representative images related to Fig 1h. Scale bars, 50 μm

**d** PCNA-PCNA PLA assay in untreated RPE1 WT vs *FANCD1* KO cells with EdU incubated for 20 mins. Dot plot shows the number of foci per EdU<sup>+</sup> cell and the red bars represent median ± interquartile range from 3 independent experiments. Representative images shown with PLA foci in red, scale bars 10 μm. EdU-positive or EdU<sup>+</sup> cells were gated to identify positive EdU incorporation (S-phase). Statistical analysis according to two-tailed Mann-Whitney test.

All source data are provided as a Source Data file.

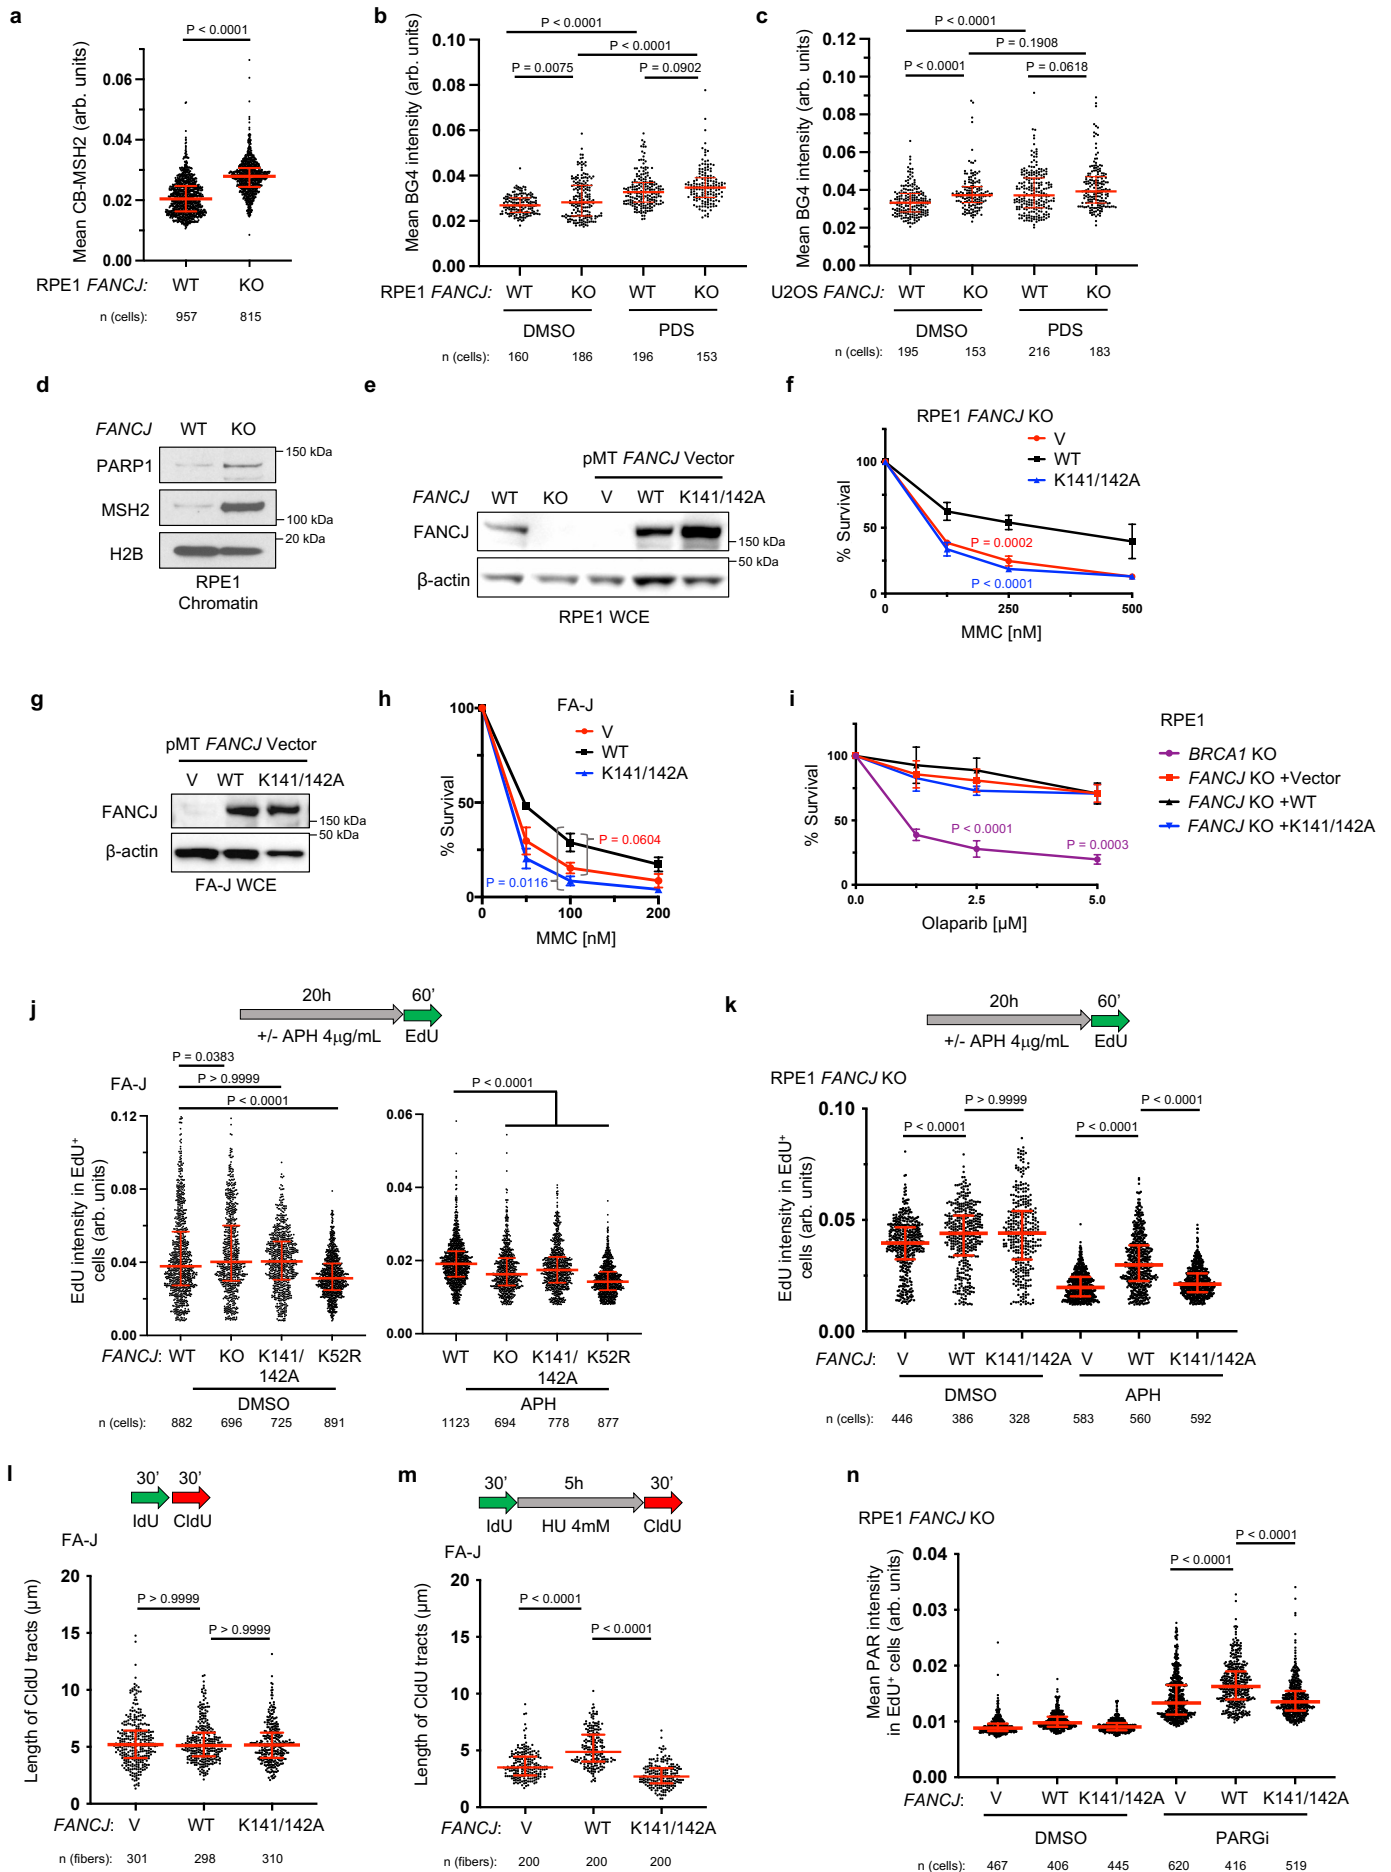

**Supplementary Figure 2: Loss of *FANCD1* or *FANCD1-MLH1* binding impairs RPA chromatin loading and replication restart.**

**a** Quantification of chromatin-bound MSH2 (CB-MSH2) in RPE1 cells. Each dot represents one cell, red bars represent median  $\pm$  interquartile range from 2 independent experiments. Statistical analysis according to two-tailed Mann-Whitney test.

**b, c** Mean BG4 fluorescence intensity in RPE1 and U2OS WT cells or *FANCD1* KO with or without 30 min 2  $\mu$ M pyridostatin (PDS). Each dot represents one cell and red bars represent median  $\pm$  interquartile range from 3 independent experiments. Statistical analysis according to Kruskal-Wallis test followed by Dunn's test.

**d** Representative WB from 2 independent experiments for chromatin bound PARP1 and MSH2 in RPE1 WT and *FANCD1* KO cells.

**e, f, g, h, i** Representative WB and cell survival assays validating the complement system in RPE1 *FANCD1* KO cells (**e, f**), FA-J cells (**g, h**), and with Olaparib (**i**) each from 3 independent experiments. Data represent the mean percentage  $\pm$ SD of survival for each dot. Significance was determined by one-way ANOVA followed by Dunnett's test. P-value color matches sample in key, compares to WT.

**j, k** Quantification of mean EdU intensity from EdU<sup>+</sup> cells. EdU was incubated for 1hr after 20 hr DMSO or aphidicolin (APH, 4  $\mu$ g/ml) treatment in the indicated cells: *FANCD1* mutant cells **j** and *FANCD1* K141/142A cells in complement systems **k**. Dots show mean EdU intensity with median  $\pm$ interquartile range from 2 independent experiments. EdU<sup>+</sup> cells were gated to identify positive EdU incorporation. Statistical analysis according to Kruskal-Wallis test, followed by Dunn's test.

**l, m** Quantification of IdU-connected CldU tracts in indicated cells following (**l**) without or (**m**) with hydroxyurea (HU) treatment (4 mM, 5 h). Each dot represents 1 fiber; data are from 2 independent experiments. Red bars represent the median  $\pm$ interquartile range. Statistical analysis according to Kruskal-Wallis test, followed by Dunn's test.

**n** Quantification of PAR intensity for indicated cells and complement systems. EdU<sup>+</sup> cells were gated according to positive EdU incorporation (S-phase). Each dot represents one cell from 2 independent experiments. Red bars represent the median  $\pm$ interquartile range. Statistical analysis according to Kruskal-Wallis test, followed by Dunn's test.

All source data are provided as a Source Data file.



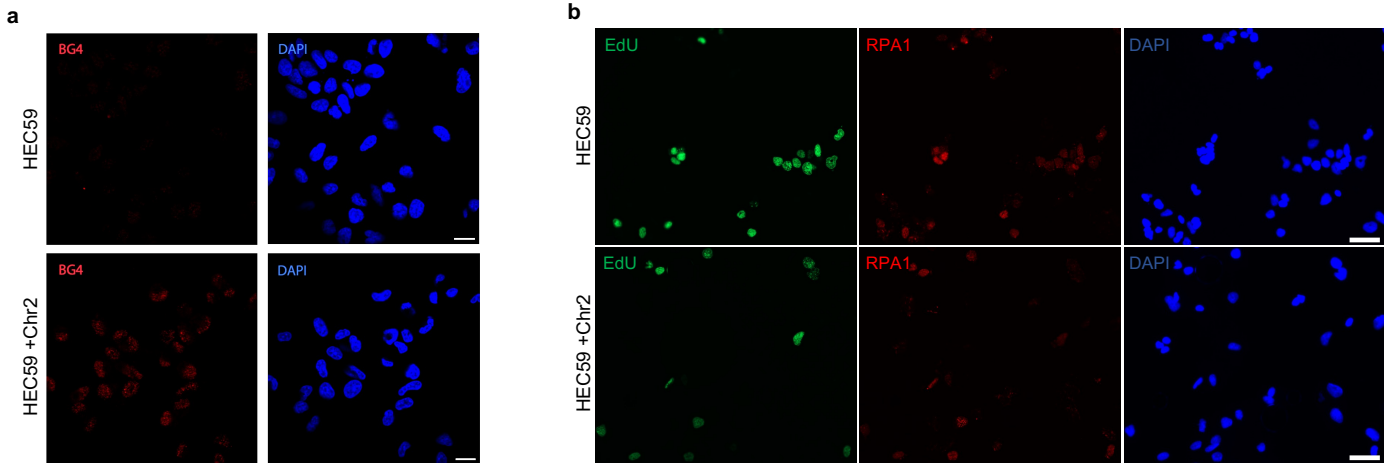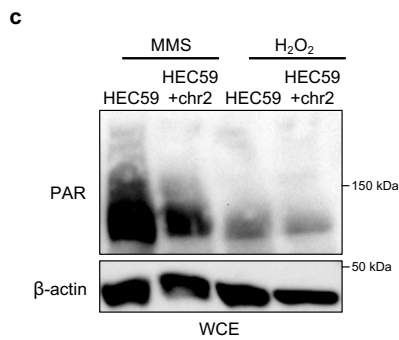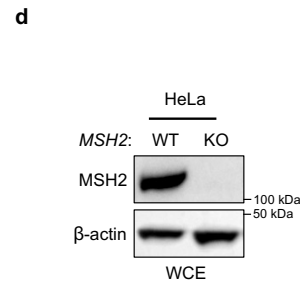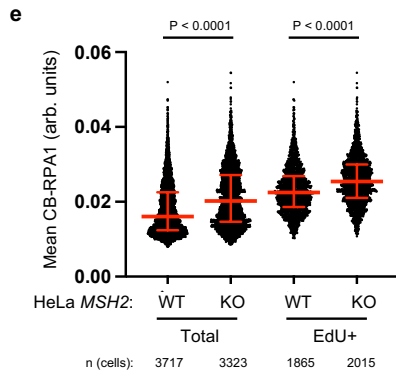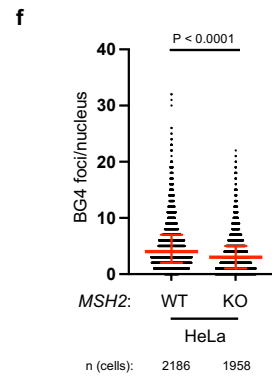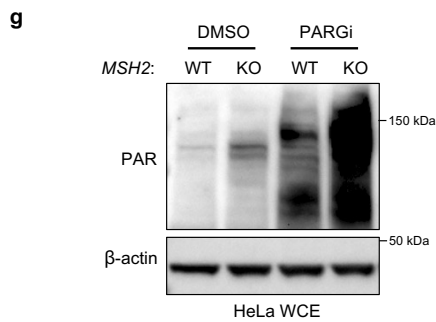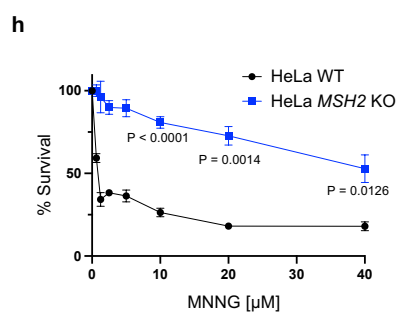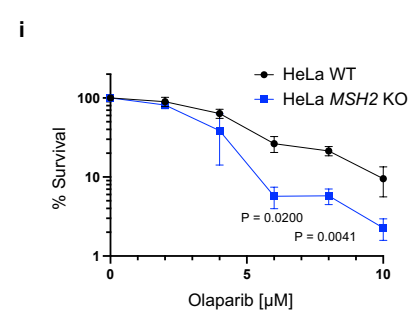

**Supplementary Figure 3: MSH2 interferes with PARP1 activation.**

**a** Representative images related to Fig 3b. Scale bars, 20  $\mu\text{m}$

**b** Representative images related to Fig 3c, d. Scale bars, 50  $\mu\text{m}$

**c** Representative WB from 3 independent experiments for the analysis of PAR formation in indicated cells treated with MMS or  $\text{H}_2\text{O}_2$  for 40 min prior to harvesting.

**d** Representative WB from 2 independent experiments for analysis of the expression levels of the indicated proteins from whole cell lysates in untreated HeLa WT vs HeLa *MSH2* KO cells.

**e** Quantification of chromatin bound RPA1 for the indicated cells with EdU incubated for the 40 min. EdU-positive or EdU<sup>+</sup> cells were gated to identify positive EdU incorporation (S-phase). Each dot represents one cell from 3 independent experiments. Red bars represent the median  $\pm$  interquartile range. Statistical analysis according to Kruskal-Wallis test, followed by Dunn's test.

**f** Quantification of G-quadruplexes (BG4 antibody) in untreated HeLa WT vs HeLa *MSH2* KO cells from 3 independent experiments. Red bars represent the median  $\pm$  interquartile range. Statistical analysis according to two-tailed Mann-Whitney test.

**g** Representative WB from 1 independent experiment for PAR in the indicated cells treated with DMSO or PARGi for 40 min prior to harvesting.

**h, i** Cell survival assays under increasing concentrations of MNNG and Olaparib from 3 independent experiments. Data represent the mean percentage  $\pm$  SD of survival for each dot. Significance was determined by unpaired t-test (two-tailed, unequal variance).

All source data are provided as a Source Data file.

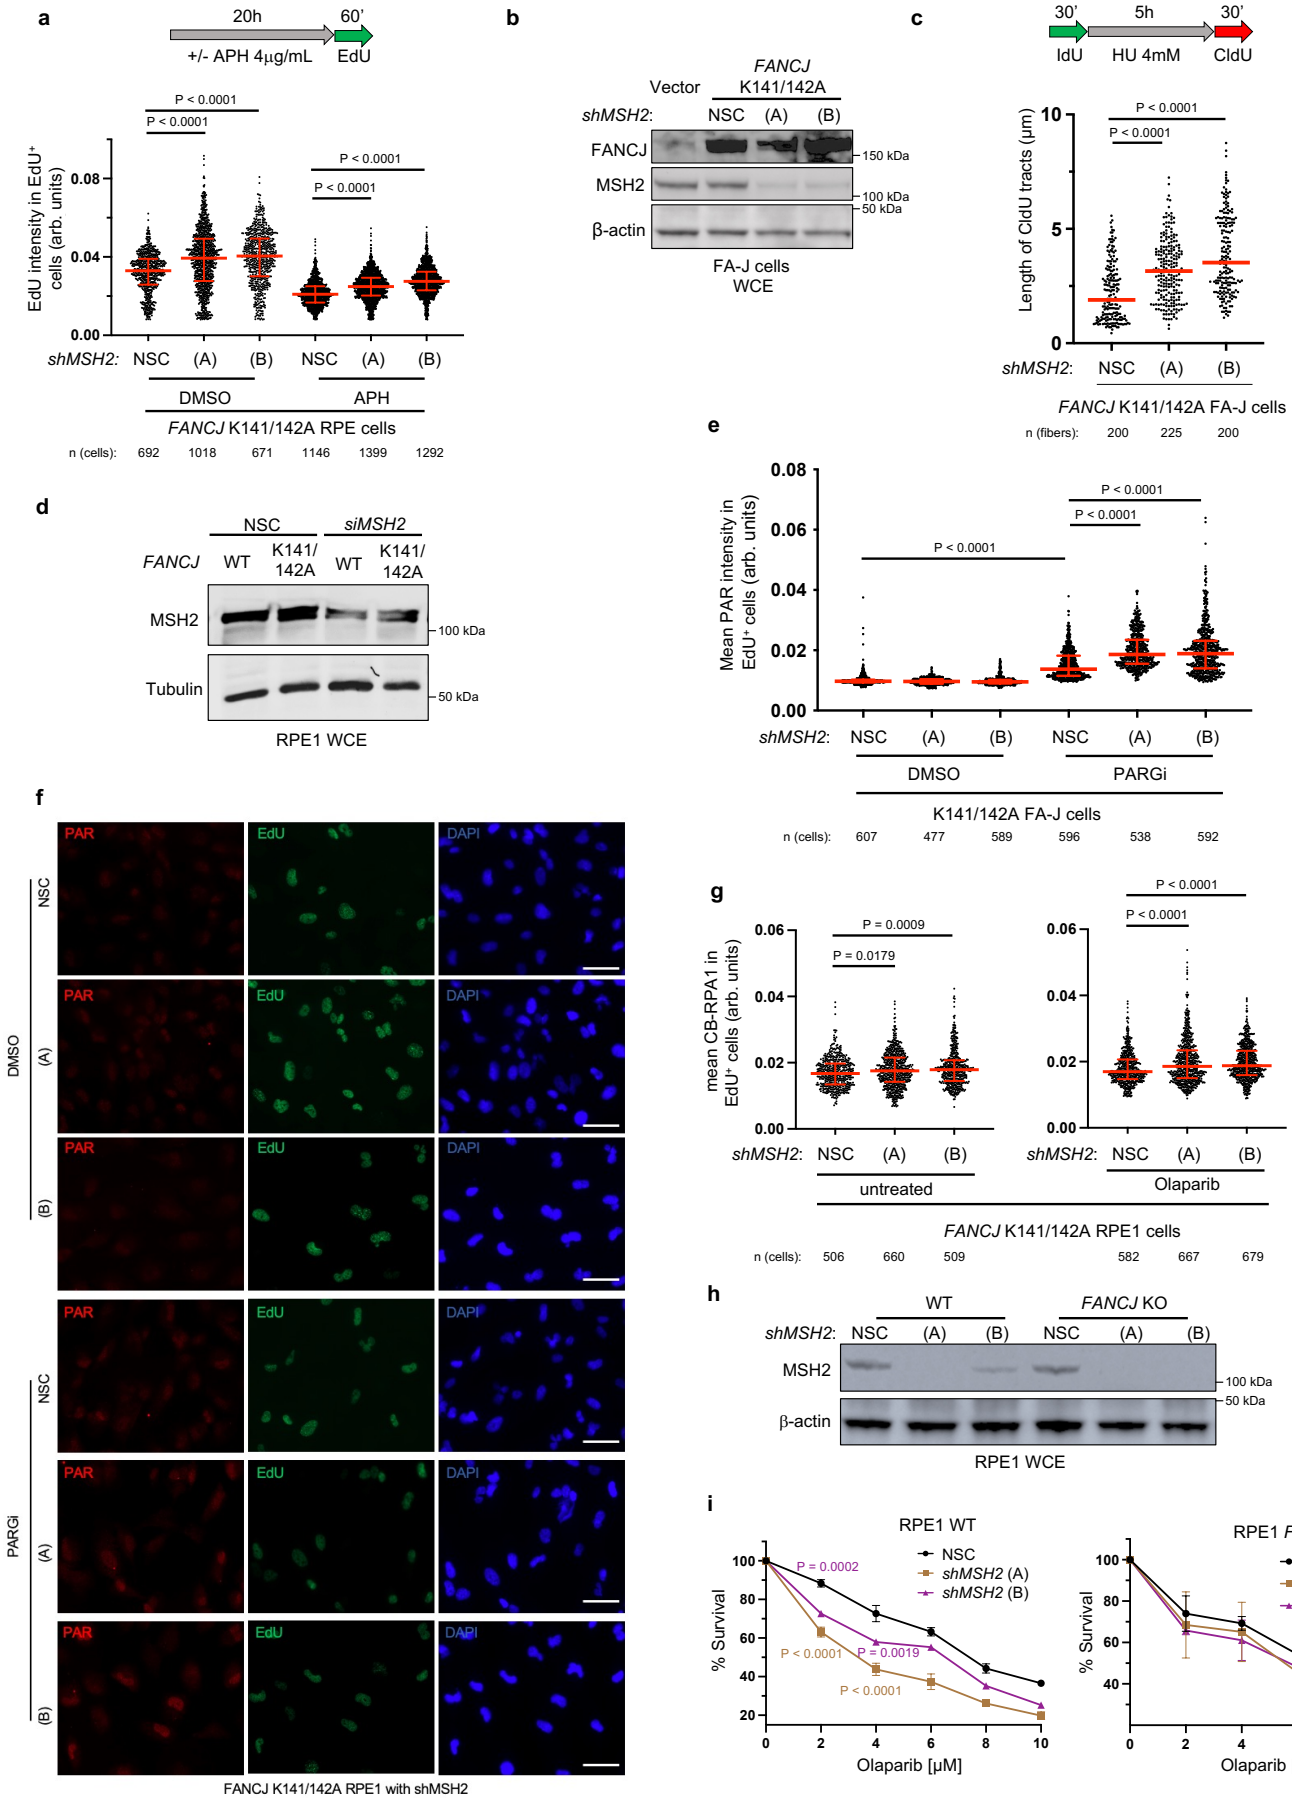

#### **Supplementary Figure 4: The FANCDJ-MLH1 interaction restricts MSH2.**

**a** Quantification of mean EdU intensity from EdU<sup>+</sup> cells. EdU was incubated for 1hr after 20 hr DMSO or aphidicolin (APH, 4 µg/ml) treatment in the indicated RPE1 cells. EdU<sup>+</sup> cells were gated according to positive EdU incorporation. Each dot represents one cell from 2 independent experiments. Red bars represent the median ± interquartile range. Statistical analysis according to Kruskal-Wallis test, followed by Dunn's test.

**b-c** WB analysis and quantification of the DNA fiber assays for the length of IdU-connected CldU tracts interrupted by HU treatment (4 mM, 5 h) in FA-J complemented cells with *MSH2* depletion, Each dot represents 1 fiber; data are from 2 independent experiments. Red bars represent the median ± interquartile range. Statistical analysis according to Kruskal-Wallis test, followed by Dunn's test.

**d** Representative WB from 3 independent experiments for analysis of the expression levels of the indicated proteins from whole cell lysates in RPE1 WT and mutant cells.

**e** Quantification of PAR after 30min DMSO or PARGi (10 µM) treatment in the indicated EdU-positive FA-J cells. EdU<sup>+</sup> cells were gated according to positive EdU incorporation. Each dot represents one cell from 3 independent experiments. Red bars represent the median ± interquartile range. Statistical analysis according to Kruskal-Wallis test, followed by Dunn's test.

**f** Representative images related to Fig 4c. Scale bars, 50 µm

**g** Quantification of CB-RPA1 for the indicated cells for (left) untreated or (right) following the Olaparib (10µM, 6h), with EdU incubated for the final 40 min. EdU<sup>+</sup> cells were gated according to positive EdU incorporation. Each dot represents one cell from 3 independent experiments. Red bars represent the median ± interquartile range. Statistical analysis according to Kruskal-Wallis test, followed by Dunn's test.

**h, i** WB analysis and cell survival assays for the indicated RPE1 cells under increasing concentrations of olaparib. Data represent the mean percentage ± SD of survival for each dot from 3 representative experiments. Significance was determined by one-way ANOVA followed by Dunnett's test comparing NSC to *shMSH2* cells. P-value color matches sample in key, compares to NSC.

All source data are provided as a Source Data file.

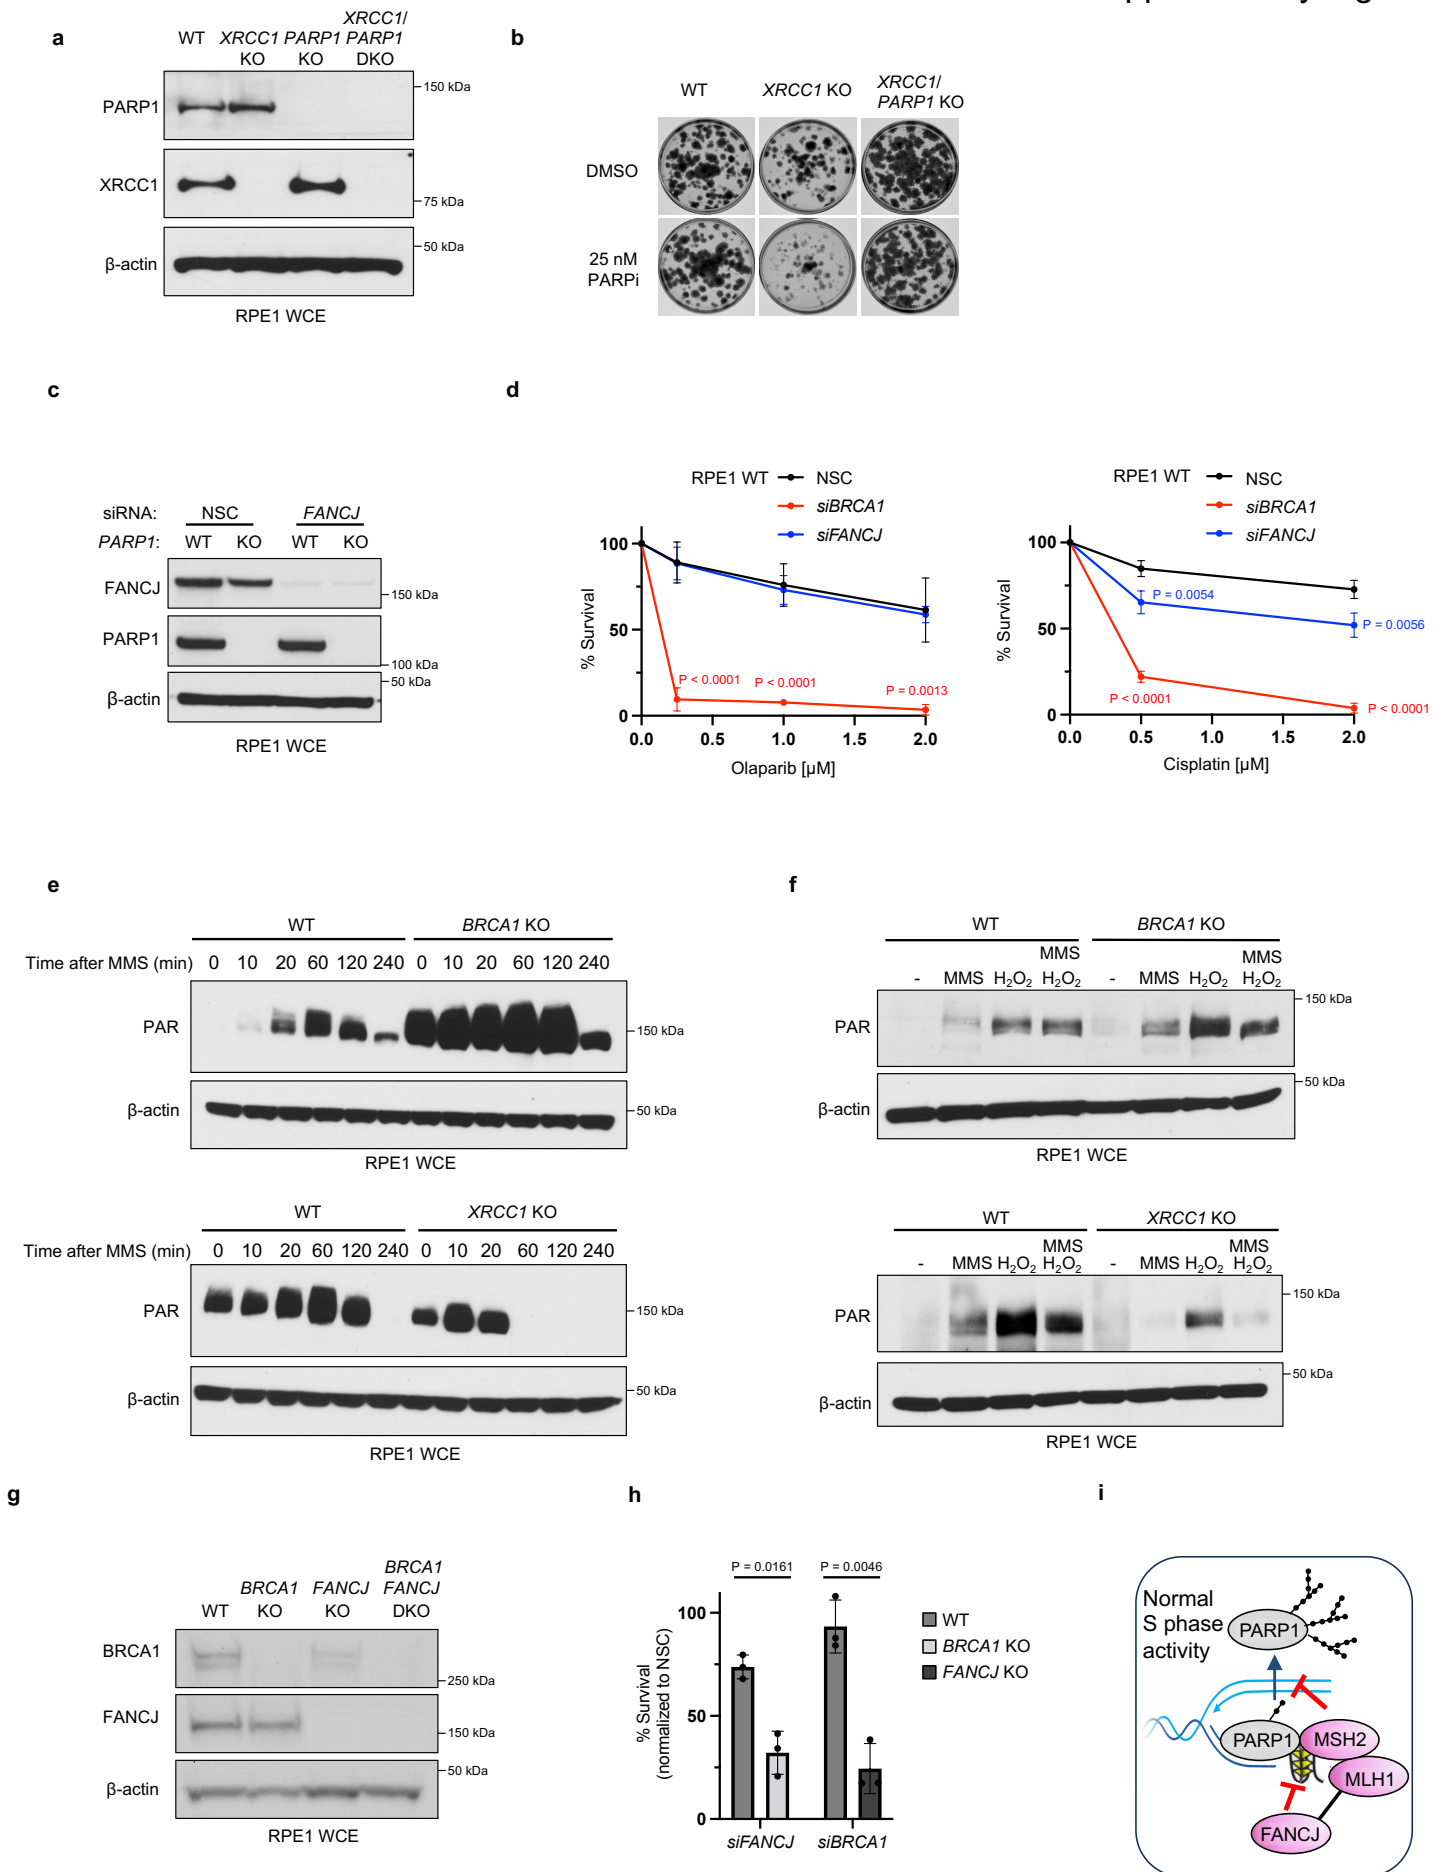

**Supplementary Figure 5: PARP1 biology is distinct in BRCA1 and XRCC1 deficient cells.**

**a** Representative WB from 3 independent experiments for analysis of the expression levels of the indicated proteins from whole cell lysates of untreated WT, *XRCC1* KO, *PARP1* KO and *XRCC1/PARP1* KO RPE1 cells.

**b** Representative clonogenic efficiency of the indicated stable RPE1 cell lines treated with PARPi from 3 independent experiments.

**c** Representative WB from 3 independent experiments for analysis of the expression levels of the indicated proteins from whole cell lysates from untreated WT vs *PARP1* KO RPE1 cells with or without *FANCI* depletion.

**d** Cell survival assays for the indicated cells under increasing concentrations of Olaparib and Cisplatin treatment. Data represent the mean percentage  $\pm$  SD of survival for each dot from three independent experiments. Significance was determined by one-way ANOVA followed by Dunnett's test, P-value color matches sample in key, compares to NSC.

**e** Representative WB from 3 independent experiments for PAR from whole cell lysates in the indicated isogenic cells following MMS (0.1mg/ml) treatment at different time points for 0-240min.

**f** Representative WB from 2 independent experiments for PAR from whole cell lysates in the indicated isogenic cells following MMS (0.1mg/ml, 60 min), H<sub>2</sub>O<sub>2</sub> (2mM, 10 min), or combined treatment (MMS 0.1mg/ml 60 min followed by H<sub>2</sub>O<sub>2</sub> 2mM, 10min).

**g** Representative WB from 2 independent experiments for analysis of the expression levels of the indicated proteins from whole cell lysates of RPE1 WT, *BRCA1* KO, *FANCI* KO and *BRCA1/FANCI* double KO (DKO) cells.

**h** Quantification of clonogenic survival assays of the indicated RPE1 cell lines and knockdown reagents. Dots represent each individual experiment while the top of the bar indicates the mean percentage  $\pm$  SD from 3 independent experiments. Significance determined by one-way ANOVA (unequal variance) followed by Dunnett's test.

**i** Model that *FANCI* dismantles replisome-associated MSH2-bound G4s through its MLH1 binding and resolves G4 structures to activate and release PARP1 from chromatin.

All source data are provided as a Source Data file.

Oligos used to generate FANCI mutants:

| Gene variant  | PCR primers                                                  | gRNA                        | ssODN                                                                                                                                       |
|---------------|--------------------------------------------------------------|-----------------------------|---------------------------------------------------------------------------------------------------------------------------------------------|
| K52R          | 5'ATTCTGGCACA<br>GATTCCTCTT<br>5'CCATGCCTGGC<br>TAATTGATTG   | 5'AAGCTTTTTTC<br>CACTTCCTGT | ACTACTTACCACTAAGAGATT<br>GTTGCCATGCTAAAGCAGAA<br>CAAAGTAAGGCTAAGCTCCG<br>TCCACTTCCTGTTGGACTCTC<br>CAACAAACAATGTTGCTTGCT<br>GTTAATCCTCTGAGAA |
| K141/<br>142A | 5'AGAAGGAGCTT<br>TCAGGATTATGG<br>5'CCATGCAGTTT<br>CACTTGAACG | 5'AAAGTTATCT<br>GCTAAGAAAC  | TAAATTACTTATATAAGACTC<br>CCCTGAAAAAACCCTCTGG<br>CTGCAAAGTTATCTGCTGCG<br>GCACAGGCATCCATATACAG<br>AGATGAAAATGATGATTTTCA<br>AGTAGAGAAGAAAAGAAT |

Supplementary table 1: PCR primers used to validate *FANCI* knock-in clones and oligos used to edit *FANCI* alleles. Guide RNAs (gRNA) used for targeting and the associated repair template single-stranded oligodeoxynucleotides (ssODN).
